# Supplementary material for: An Abattoir-Based Study on the Prevalence of Salmonella Fecal Carriage and ESBL Related Antimicrobial Resistance from Culled Adult Dairy Cows in Wuhan, China
Source: MDPI journal article supplement (doi:10.3390/pathogens9100853), 2020-10-19
Supplement: s1 [file s1]

**Table S1.** Information of *Salmonella* isolates in the abattoir.

| No. | Distribution    | Age (Year) | Serotype           | ESBL Phenotype | ESBLs Gene         | FFC | PB | CEF | SXT | AMP | ENR | TET | IPM | GEN |
|-----|-----------------|------------|--------------------|----------------|--------------------|-----|----|-----|-----|-----|-----|-----|-----|-----|
| 1   | Central China   | > 5        | Could not be typed | No             | Could not be typed | S   | S  | S   | I   | S   | S   | R   | S   | S   |
| 2   | North China     | > 5        | Could not be typed | No             | Could not be typed | S   | S  | I   | I   | S   | S   | S   | S   | S   |
| 3   | Central China   | > 5        | Could not be typed | No             | Could not be typed | R   | S  | S   | I   | S   | I   | R   | S   | S   |
| 4   | Central China   | 2          | Typhimurium        | No             | Could not be typed | S   | S  | S   | S   | R   | S   | S   | S   | R   |
| 5   | Central China   | > 5        | Typhimurium        | No             | Could not be typed | S   | S  | S   | S   | R   | S   | S   | S   | S   |
| 6   | North China     | > 5        | Typhimurium        | No             | Could not be typed | S   | S  | S   | I   | R   | I   | S   | S   | S   |
| 7   | North China     | > 5        | Typhimurium        | No             | Could not be typed | R   | S  | S   | R   | R   | R   | R   | S   | R   |
| 8   | North China     | 4          | Typhimurium        | No             | Could not be typed | R   | S  | S   | I   | R   | R   | R   | S   | R   |
| 9   | North China     | > 5        | Typhimurium        | No             | Could not be typed | R   | S  | S   | I   | R   | R   | R   | S   | R   |
| 10  | North China     | > 5        | Typhimurium        | No             | Could not be typed | S   | S  | S   | S   | R   | S   | S   | S   | S   |
| 11  | North China     | 3          | Could not be typed | No             | Could not be typed | R   | S  | S   | R   | R   | I   | R   | S   | R   |
| 12  | Northeast China | 4          | Typhimurium        | No             | Could not be typed | R   | S  | S   | I   | R   | R   | R   | S   | R   |
| 13  | North China     | 4          | Typhimurium        | No             | Could not be typed | S   | S  | S   | S   | R   | S   | S   | S   | S   |
| 14  | North China     | > 5        | Typhimurium        | No             | Could not be typed | R   | S  | R   | I   | R   | R   | R   | S   | R   |
| 15  | lack            | 4          | Typhimurium        | Yes            | CTX-M              | S   | S  | R   | I   | R   | S   | R   | S   | S   |

|    |                 |     |                    |     |                    |   |   |   |   |   |   |   |   |   |
|----|-----------------|-----|--------------------|-----|--------------------|---|---|---|---|---|---|---|---|---|
| 16 | Northeast China | > 5 | Typhimurium        | No  | Could not be typed | S | S | I | S | R | S | S | S | S |
| 17 | Northeast China | > 5 | Could not be typed | No  | Could not be typed | R | S | S | S | R | R | R | S | S |
| 18 | Northeast China | > 5 | Could not be typed | No  | Could not be typed | R | S | S | S | R | I | R | S | S |
| 19 | Central China   | > 5 | Could not be typed | No  | Could not be typed | R | S | S | S | R | I | R | S | S |
| 20 | Northeast China | > 5 | Could not be typed | No  | Could not be typed | R | S | S | I | R | R | R | S | S |
| 21 | Northeast China | > 5 | Typhimurium        | No  | Could not be typed | S | S | R | S | R | S | S | S | S |
| 22 | Northeast China | > 5 | Could not be typed | No  | CTX-M              | S | S | R | I | R | R | R | S | R |
| 23 | Northeast China | > 5 | Typhimurium        | No  | Could not be typed | S | S | R | S | R | S | S | S | S |
| 24 | Northeast China | > 5 | Typhimurium        | Yes | CTX-M              | S | S | R | I | R | S | R | S | S |
| 25 | Northeast China | > 5 | Typhimurium        | No  | Could not be typed | S | S | S | S | R | S | S | S | S |
| 26 | Northeast China | > 5 | Typhimurium        | No  | Could not be typed | S | S | S | S | R | S | R | S | S |
| 27 | Northeast China | > 5 | Typhimurium        | No  | Could not be typed | S | S | R | S | R | S | R | S | S |
| 28 | North China     | > 5 | Could not be typed | Yes | CTX-M              | S | S | R | S | R | R | R | S | R |
| 29 | North China     | > 5 | Could not be typed | Yes | CTX-M              | R | S | R | I | R | R | R | S | R |
| 30 | Northeast China | > 5 | Could not be typed | No  | CTX-M              | S | S | R | I | R | R | R | S | R |
| 31 | Northeast China | > 5 | Typhimurium        | No  | Could not be typed | S | S | R | I | R | S | S | S | S |
| 32 | Northeast China | 4   | Typhimurium        | No  | Could not be typed | S | S | I | S | R | S | S | S | S |

|     |                 |     |                    |     |                    |   |   |   |   |   |   |   |   |   |
|-----|-----------------|-----|--------------------|-----|--------------------|---|---|---|---|---|---|---|---|---|
| 33  | Northeast China | > 5 | Typhimurium        | No  | Could not be typed | S | S | R | S | R | S | S | S | S |
| 34  | Northeast China | > 5 | Typhimurium        | Yes | CTX-M              | S | S | R | S | R | S | R | S | S |
| 35  | Northeast China | > 5 | Typhimurium        | Yes | CTX-M              | S | S | R | I | R | S | R | S | S |
| 36  | North China     | 3   | Typhimurium        | No  | Could not be typed | S | S | S | S | R | S | S | S | S |
| 37  | North China     | > 5 | Typhimurium        | No  | Could not be typed | S | S | S | S | R | S | S | S | S |
| 38* | North China     | > 5 | Could not be typed | No  | Could not be typed | R | S | R | S | S | S | R | S | S |
| 39* | North China     | > 5 | Could not be typed | Yes | CTX-M              | S | S | R | S | R | S | S | S | S |
| 40  | North China     | 4   | Typhimurium        | No  | Could not be typed | S | S | S | S | R | S | S | S | S |
| 41  | Northeast China | 3   | Dublin             | No  | Could not be typed | S | S | S | S | S | S | S | S | S |

FFC: Florfenicol; PB: Polymyxin B; CEF: Ceftiofur; SXT: Sulfamethoxazole-Trimethoprim; AMP: Ampicillin; ENR: Enrofloxacin; TET: Tetracycline; IPM: Imipenem; GEN: Gentamicin; S: sensitivity; R: resistance; I: intermediary. \* From the same sample.

**Table S2.** The combination of multi-drug resistance.

| Combination             | Number of Isolates |
|-------------------------|--------------------|
| SXT+GEN+ENR+TET+AMP+FFC | 1                  |
| SXT+GEN+TET+AMP+FFC     | 1                  |
| GEN+ENR+TET+AMP+FFC+CEF | 2                  |
| GEN+ENR+TET+AMP+FFC     | 3                  |
| ENR+TET+AMP+FFC         | 2                  |
| GEN+ENR+TET+AMP+CEF     | 3                  |
| TET+AMP+CEF             | 5                  |
| TET+FFC+CEF             | 1                  |
| TET+AMP+FFC             | 2                  |

SXT: Sulfamethoxazole-Trimethoprim; GEN: Gentamicin; ENR: Enrofloxacin; TET: Tetracycline; AMP: Ampicillin; FFC: Florfenicol; CEF: Ceftiofur.
